# Supplementary material
Source: PubMed Central journal article supplement (PMC1523393)
Supplement: JCI0626283sd.pdf [file JCI0626283sd.pdf]

## Supplemental Figures

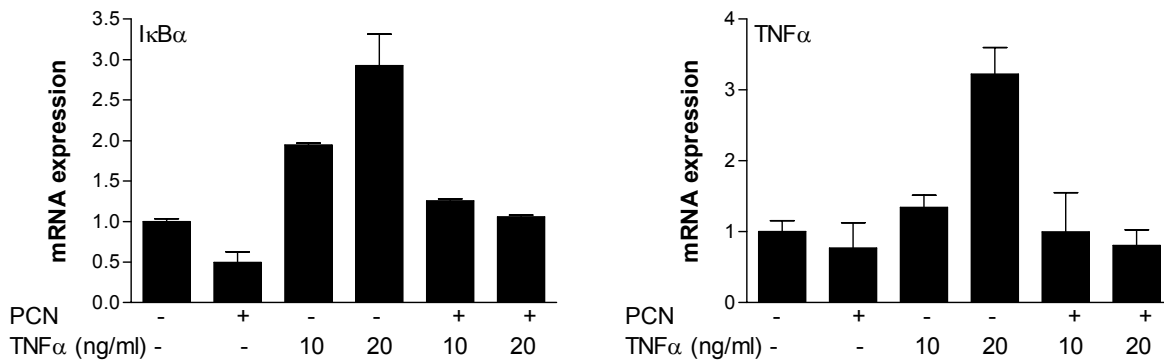

**Supplemental Figure 1. Activation of mouse PXR by PCN inhibits the expression of NF-κB target genes in mouse primary hepatocytes.**

Mouse primary hepatocytes were isolated from wild type C57BL6/J mice and treated with DMSO, 10 μM PCN or TNFα at indicated concentration for 24h. Total RNAs were isolated and the expression of NF-κB target genes was determined by QRT-PCR.

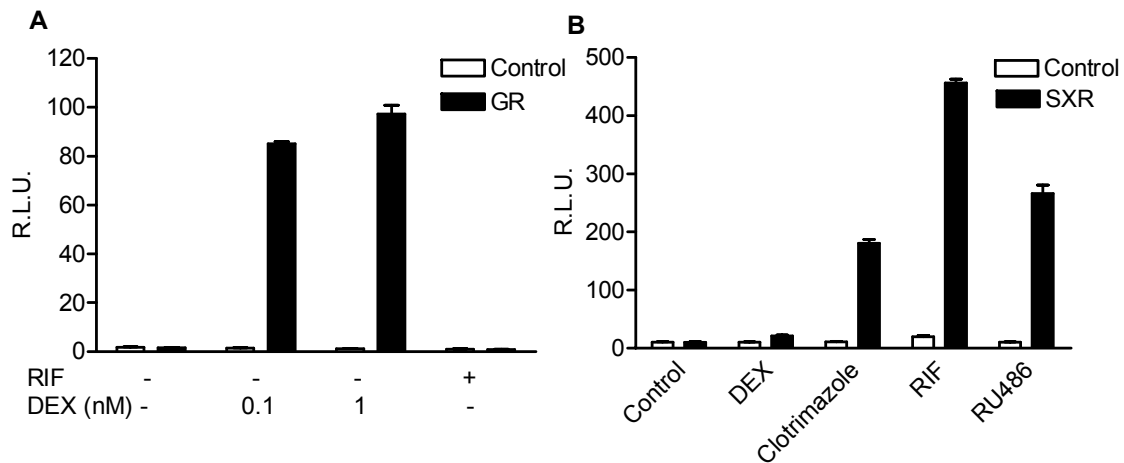

**Supplemental Figure 2. RIF activates SXR, but not GR.**

(A) HepG2 cells were co-transfected with a GR dependent reporter ( $\Delta$ MTV-GRE-luc) and either a GR expression plasmid or control DNA before treatment with DEX (0.1 or 1 nM) or RIF (10  $\mu$ M) for 24 h. (B) HepG2 cells were co-transfected with SXR reporter (SXRE-luc) and either an SXR expression vector or control vector. Cells were then treated with 10  $\mu$ M DEX, clotrimazole, RIF or RU486.

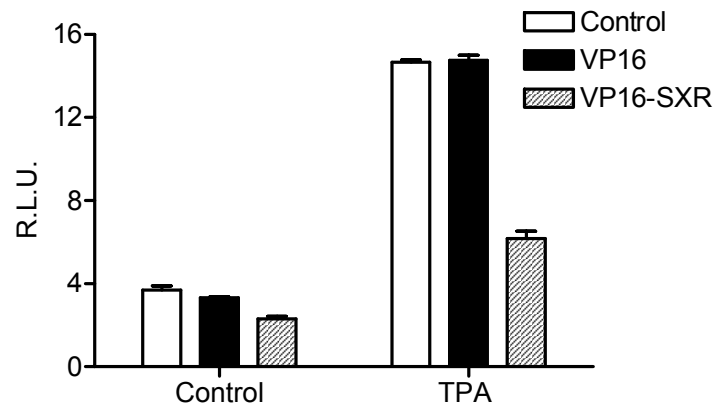

**Supplemental Figure 3. Constitutively activated SXR represses NF- $\kappa$ B dependent transcription in the absence of ligands.**

A constitutively active SXR expression plasmid (VP16-SXR) represses TPA-induced NF- $\kappa$ B transcription in the absence of ligands. HepG2 cells were transfected with NF- $\kappa$ B reporter along with the indicated vectors. Cells were treated with TPA (0.1nM) or RIF at the indicated concentrations 24 h before the assay.

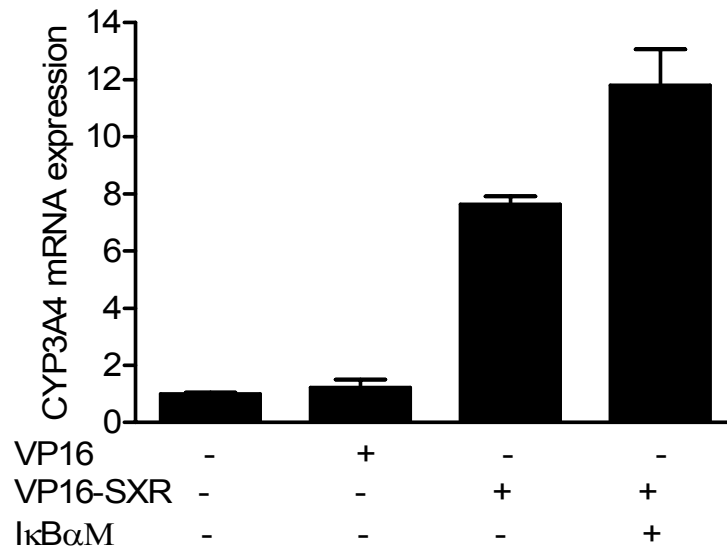

**Supplemental Figure 4. Inhibition of NF- $\kappa$ B activity enhances the ability of VP16-SXR to induce CYP3A4 gene expression.**

LS180 cells were transfected with VP16 or VP16-SXR expression vector along with control vector or I $\kappa$ B $\alpha$ M vector. 24 h later, total RNAs were isolated and expression of NF- $\kappa$ B target genes was determined by QRT-PCR.

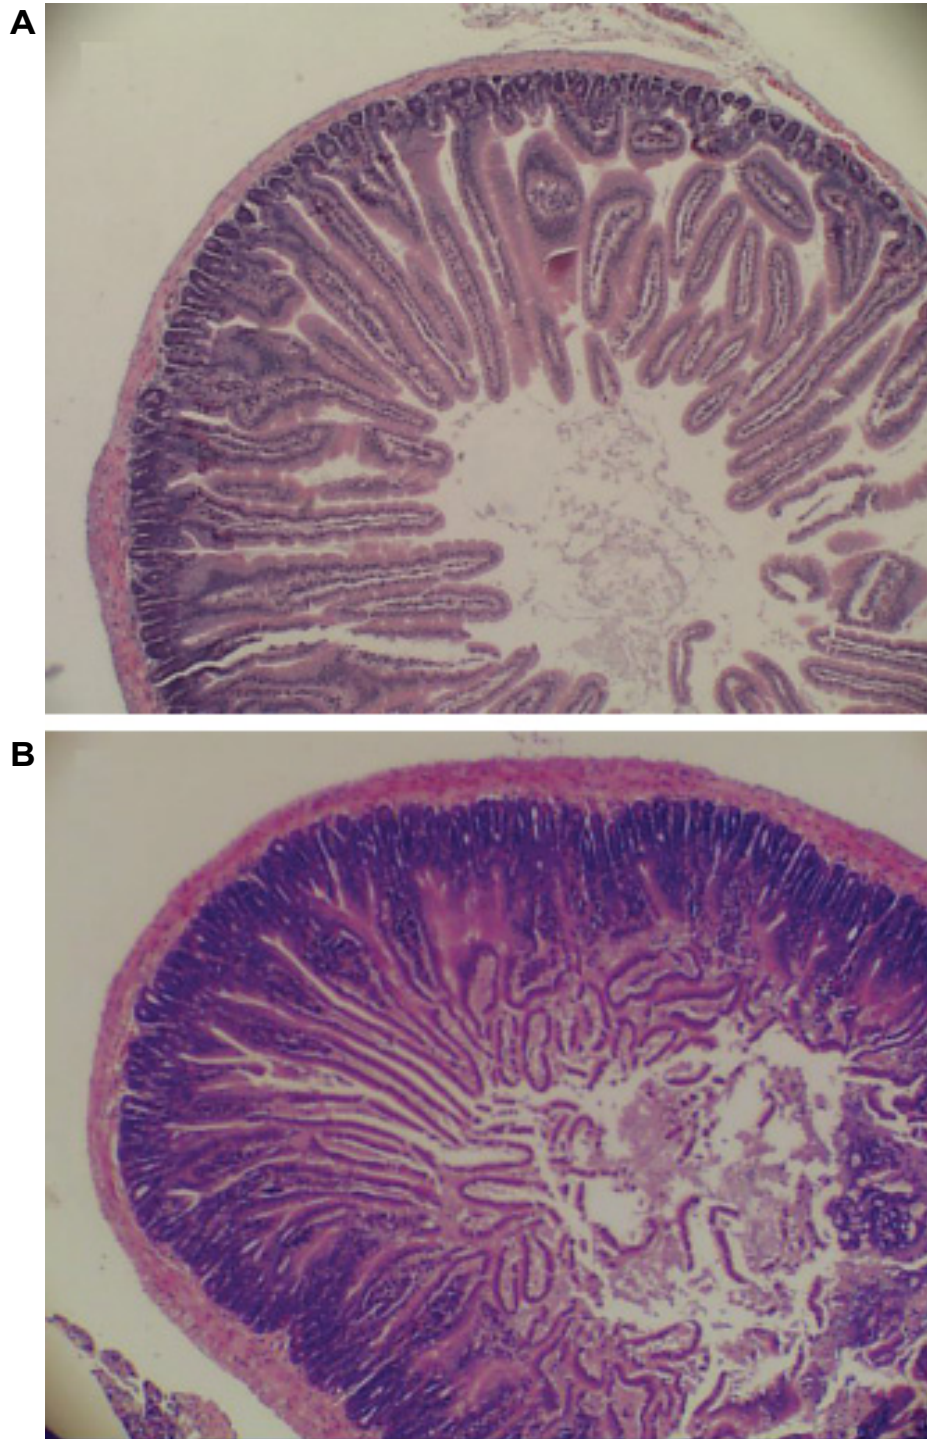

**Supplemental Figure 5. Histological evidence of increased small bowel inflammation.**

Hematoxylin and eosin (H&E) stained, formalin fixed, paraffin embedded, transverse sections of proximal jejunum obtained 1 cm from the gastroduodenal junction. Panel A is a representative

section from a wild type mouse, whereas panel **B** is from a PXR<sup>-/-</sup> mouse. The magnification is x40 for both panels.
